# Supplementary material for: Synthesis of a highly reactive form of WO2Cl2, its conversion into nanocrystalline mono-hydrated WO3and coordination compounds with tetramethylurea
Source: Royal Society of Chemistry journal article supplement (doi:10.1039/c6dt02997c), 2016-01-01
Supplement: c6dt02997c2.pdf [file c6dt02997c2.pdf]

# Synthesis of a Highly Reactive Form of $\text{WO}_2\text{Cl}_2$ , its Conversion into Nanocrystalline Mono-Hydrated $\text{WO}_3$ and Coordination Compounds with Tetramethylurea

*Marco Bortoluzzi, Claudio Evangelisti, Fabio Marchetti, Guido Pampaloni, Fabio Piccinelli, Stefano Zacchini*

## Supporting Information

| <b><u>Table of contents</u></b>                                                                                                                                                               | <i>Page</i> |
|-----------------------------------------------------------------------------------------------------------------------------------------------------------------------------------------------|-------------|
| <b>Figure S1.</b> P-XRD patterns of orthorhombic $\text{WO}_2\text{Cl}_2$ , yellow $\text{WO}_2\text{Cl}_2$ and grey $\text{WO}_2\text{Cl}_2$                                                 | S2          |
| <b>Figure S2.</b> Representative HR-TEM micrograph of yellow $\text{WO}_2\text{Cl}_2$                                                                                                         | S3          |
| <b>Figure S3.</b> Comparative view of P-XRD patterns                                                                                                                                          | S4          |
| <b>Figure S4.</b> Representative micrograph and selected area electron diffraction (SAED) pattern of light green $\text{WO}_3 \cdot \text{H}_2\text{O}$ (from grey $\text{WO}_2\text{Cl}_2$ ) | S5          |
| <b>Figure S5.</b> Representative HR-TEM micrograph of lemon yellow $\text{WO}_3 \cdot \text{H}_2\text{O}$ (from yellow $\text{WO}_2\text{Cl}_2$ )                                             | S6          |
| <b>Table S1.</b> Computed average Mayer bond orders (C-PCM/ $\omega$ B97X) for the W–O interactions in <b>1</b>                                                                               | S7          |
| <b>Figure S6.</b> DFT C-PCM/ $\omega$ B97X calculated structure of <b>2</b>                                                                                                                   | S8          |

**Figure S1.** P-XRD patterns of: orthorhombic  $\text{WO}_2\text{Cl}_2$  (space group  $Immm$ ; simulated from PDF 01-081-2322, red line); commercial yellow  $\text{WO}_2\text{Cl}_2$  (black line); grey  $\text{WO}_2\text{Cl}_2$  protected from the moisture with a thin layer of inert paraffin oil (blue line).

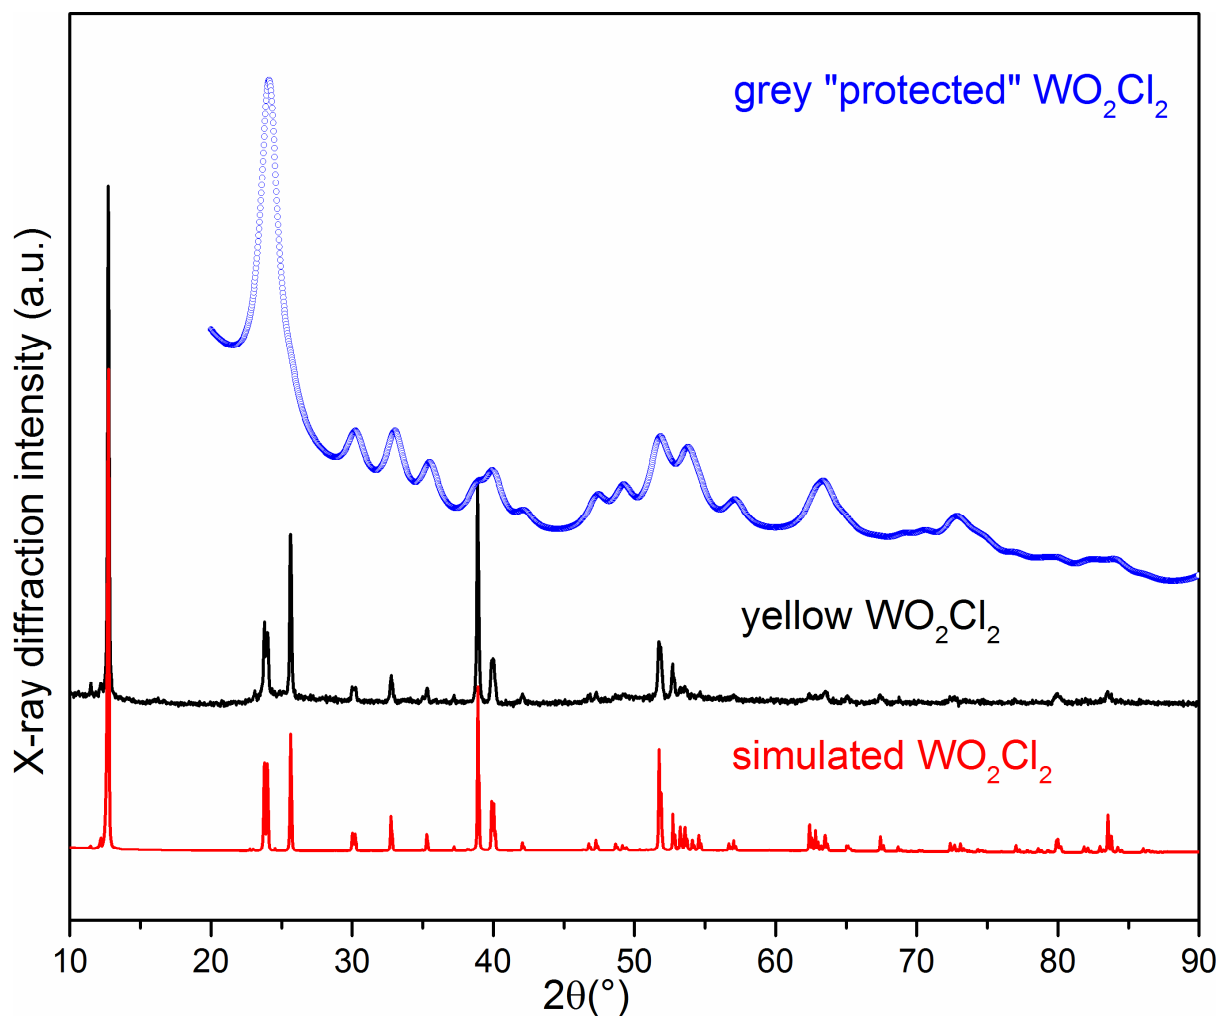

The *blue line* pattern has been cut in the 10-20°  $2\theta$  range, due to the presence of a very broad peak ascribable to the paraffin oil. The paraffin oil is responsible also for the broadened profile of the diffraction peaks.

**Figure S2.** Representative HRTEM micrograph of commercial (yellow)  $\text{WO}_2\text{Cl}_2$ .

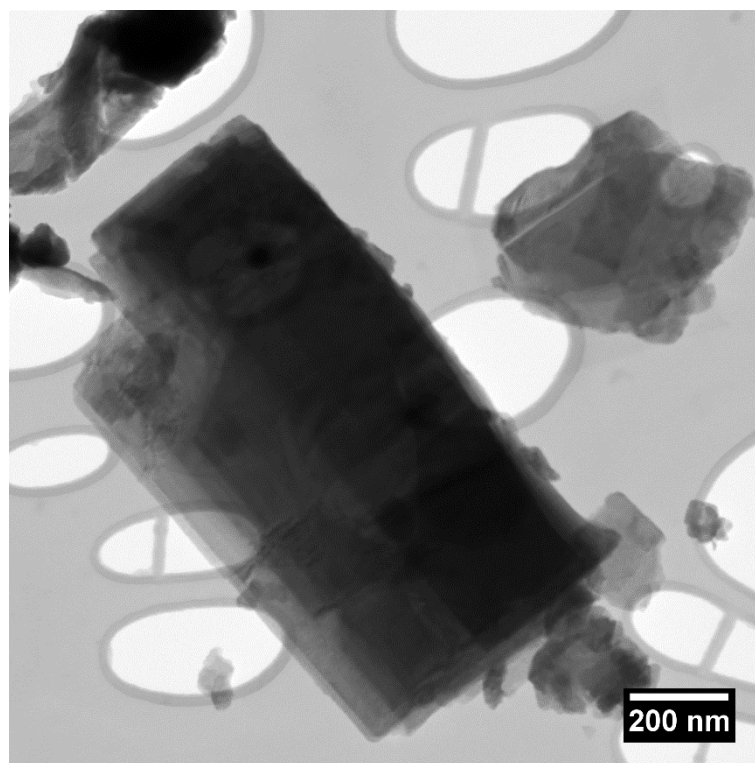

**Figure S3.** Comparative view of the P-XRD patterns of the solid materials obtained from: grey  $\text{WO}_2\text{Cl}_2$ , after air exposure for 3 days (red line); grey  $\text{WO}_2\text{Cl}_2$ , after air exposure for 10 minutes (black line); yellow  $\text{WO}_2\text{Cl}_2$ , after air exposure for 3 days (blue line).

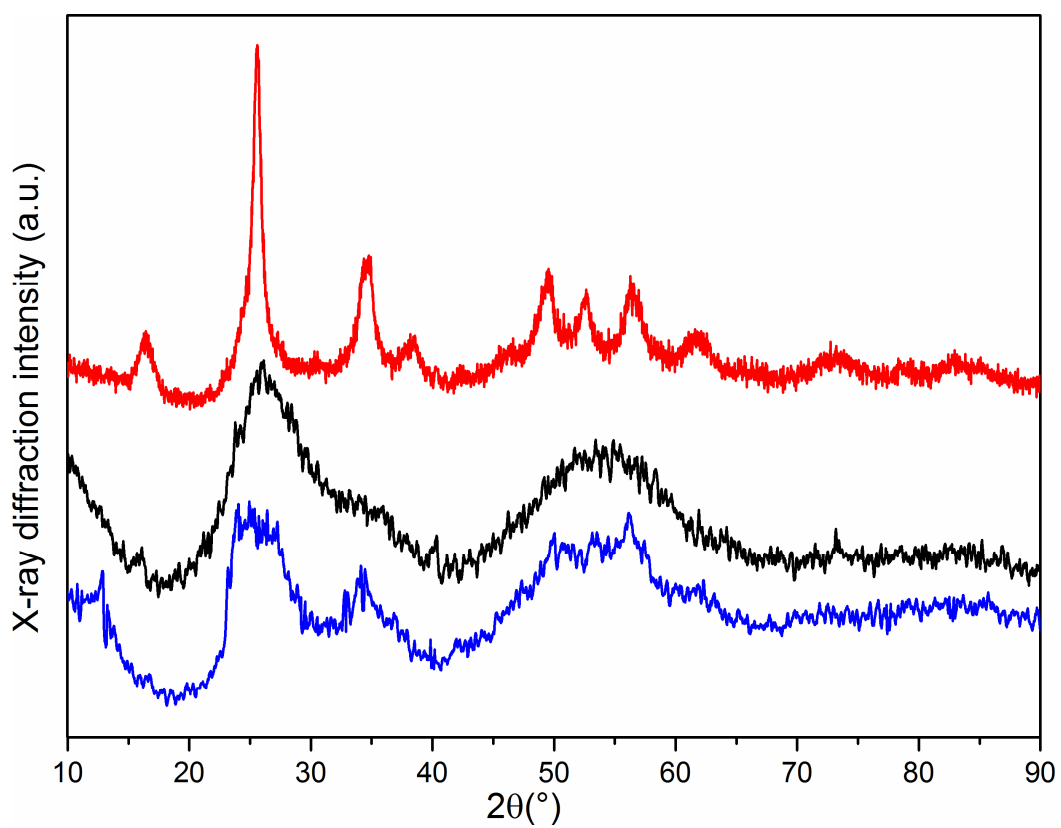

**Figure S4.** Representative micrograph (left side) and selected area electron diffraction (SAED) pattern (right side) of  $\text{WO}_3 \cdot \text{H}_2\text{O}$  (light green solid, from hydrolysis of grey  $\text{WO}_2\text{Cl}_2$ ).

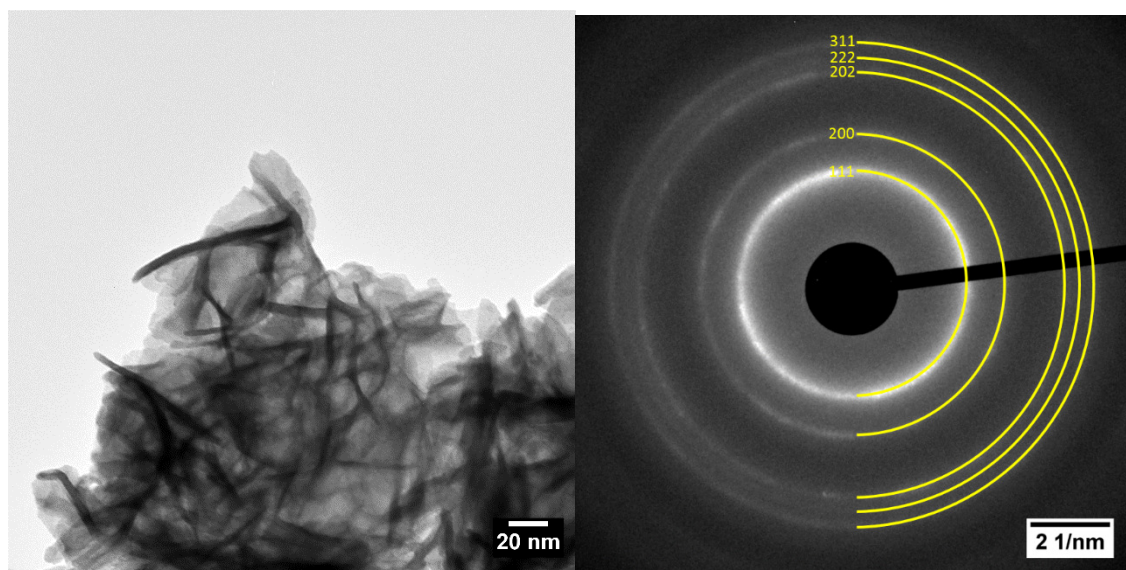

**Figure S5.** Representative HRTEM micrograph of  $\text{WO}_3 \cdot \text{H}_2\text{O}$  (lemon yellow solid, from hydrolysis of commercial yellow  $\text{WO}_2\text{Cl}_2$ ).

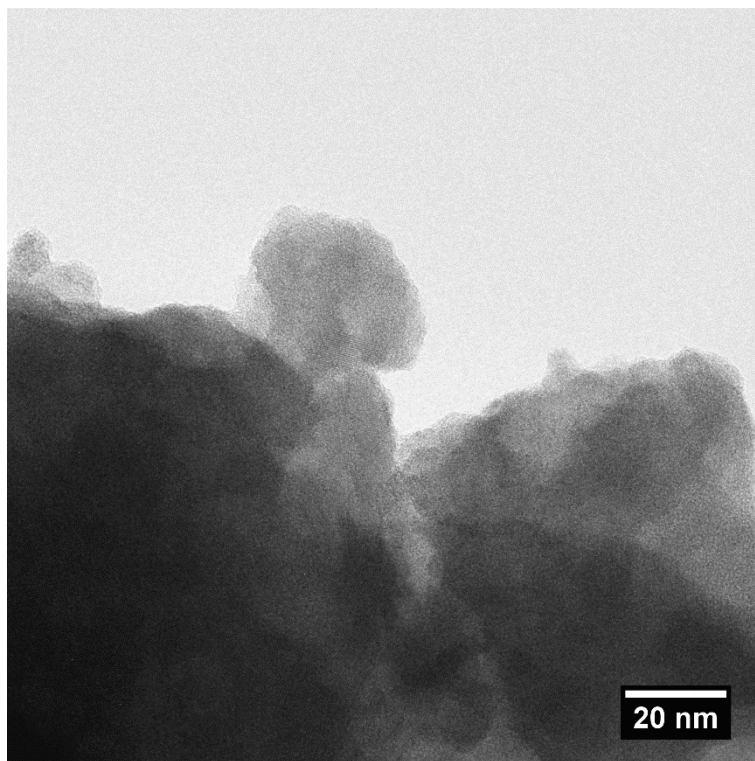

**Table S1.** Computed average Mayer bond orders (C-PCM/ $\omega$ B97X) for the W–O interactions in **1**.

|               |       |
|---------------|-------|
| W=O(terminal) | 1.933 |
| W=O(bridging) | 1.444 |
| W–O(bridging) | 0.310 |
| W–O(tmu)      | 0.507 |

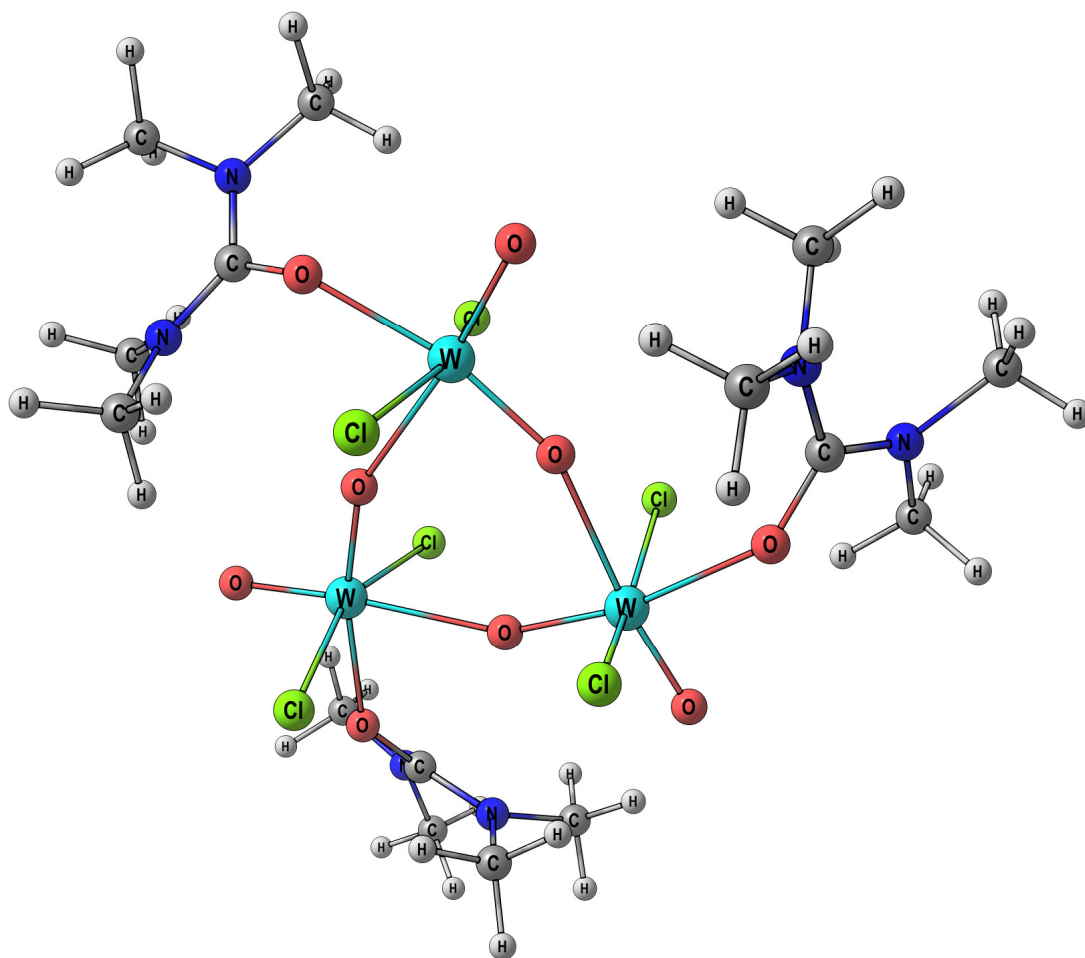

**Figure S6.** DFT C-PCM/ $\omega$ B97X calculated structure of  $\text{WO}_2\text{Cl}_2(\text{tmu})_2$ , **2**. Dichloromethane as implicit solvent.

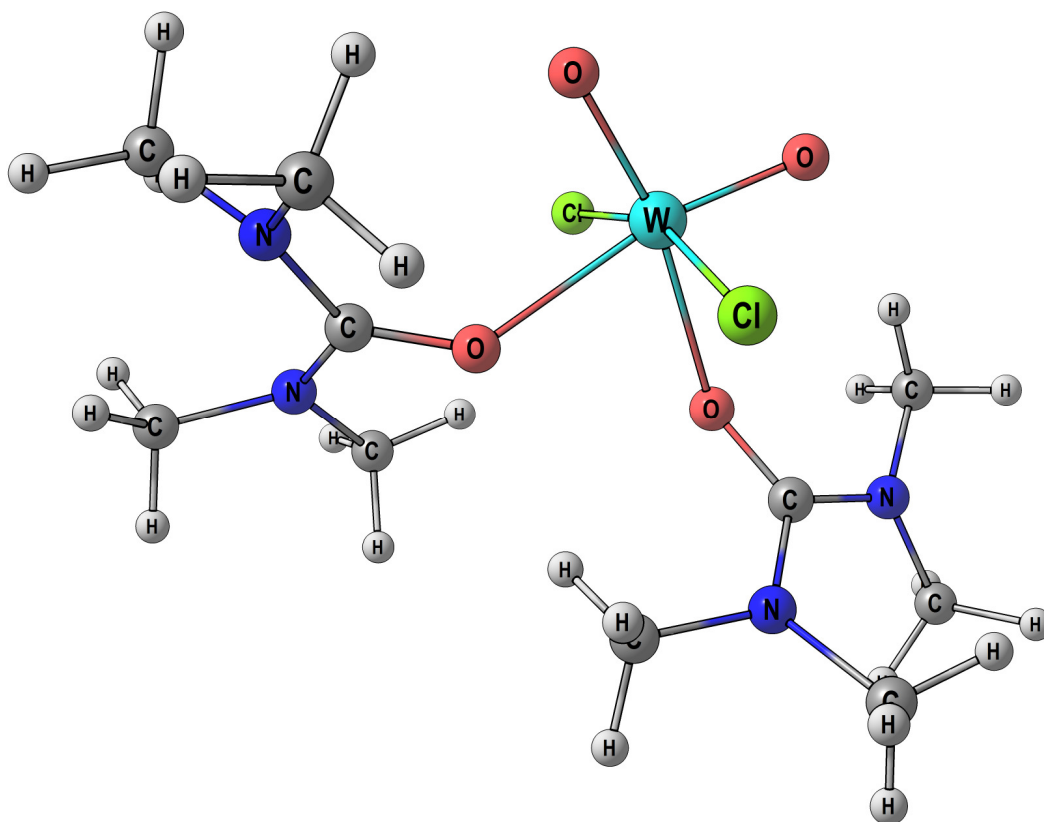

**Table S2.** Selected computed bond lengths (Å) and angles (°) for  $\text{WO}_2\text{Cl}_2(\text{tmu})_2$ , **2**.

| Bond |       | Angle  |       |
|------|-------|--------|-------|
| W=O  | 1.686 | O=W=O  | 102.2 |
|      | 1.690 | O=W-O  | 90.3  |
| W-O  | 2.213 |        | 90.9  |
|      | 2.185 |        | 166.8 |
| W-Cl | 2.398 |        | 167.4 |
|      | 2.399 | O=W-Cl | 95.2  |
| C=O  | 1.271 |        | 96.2  |
|      | 1.272 |        | 95.7  |
|      |       |        | 95.2  |
|      |       | C=O-W  | 134.7 |
|      |       |        | 140.6 |
